# Supplementary material for: Dalpulapans A–E from the roots of Dalbergia stipulacea
Source: Royal Society of Chemistry journal article supplement (doi:10.1039/d1ra07041j), 2021-01-01
Supplement: d1ra07041j1.pdf [file d1ra07041j1.pdf]

## Supporting Information

### **Dalpulapans A-E from the Roots of *Dalbergia stipulacea***

Priyapan Posri,<sup>a</sup> Thurdpong Sribuhom,<sup>a</sup> Sookkawath Walunchapruk,<sup>b</sup> Thanaset Senawong,<sup>b</sup>  
Sarawut Tontapha,<sup>c</sup> Vittaya Amornkitbamrung,<sup>c</sup> and Chavi Yenjai\*<sup>a</sup>

<sup>a</sup>Natural Products Research Unit, Center of Excellence for Innovation in Chemistry, Department of Chemistry, Faculty of Science, Khon Kaen University, Khon Kaen 40002, Thailand

<sup>b</sup>Natural Products Research Unit, Department of Biochemistry, Faculty of Science, Khon Kaen University, Khon Kaen 40002, Thailand.

<sup>c</sup>Integrated Nanotechnology Research Centre, Department of Physics, Faculty of Science, Khon Kaen University, Khon Kaen 40002, Thailand

Authors to whom correspondence should be addressed.

\*Tel: +66-4320-2222-41 ext. 12243. Fax: +66-4320-2373. E-mail: [chayen@kku.ac.th](mailto:chayen@kku.ac.th) (C. Yenjai).

**Contents**

- Figure S1.  $^1\text{H}$  NMR spectrum of dalpulapan A (1)
- Figure S2.  $^{13}\text{C}$  NMR spectrum of dalpulapan A (1)
- Figure S3.  $^1\text{H}$ - $^1\text{H}$  COSY spectrum of dalpulapan A (1)
- Figure S4. HMQC spectrum of dalpulapan A (1)
- Figure S5. HMBC spectrum of dalpulapan A (1)
- Figure S6. MS spectrum of dalpulapan A (1)
- Figure S7. ECD spectrum of dalpulapan A (1)
- Figure S8.  $^1\text{H}$  NMR spectrum of dalpulapan B (2)
- Figure S9.  $^{13}\text{C}$  NMR spectrum of dalpulapan B (2)
- Figure S10.  $^1\text{H}$ - $^1\text{H}$  COSY spectrum of dalpulapan B (2)
- Figure S11. HMQC spectrum of dalpulapan B (2)
- Figure S12. HMBC spectrum of dalpulapan B (2)
- Figure S13. MS spectrum of dalpulapan B (2)
- Figure S14. ECD spectrum of dalpulapan B (2)
- Figure S15.  $^1\text{H}$  NMR spectrum of dalpulapan C (3)
- Figure S16.  $^{13}\text{C}$  NMR spectrum of dalpulapan C (3)
- Figure S17.  $^1\text{H}$ - $^1\text{H}$  COSY spectrum of dalpulapan C (3)
- Figure S18. HMQC spectrum of dalpulapan C (3)
- Figure S19. HMBC spectrum of dalpulapan C (3)
- Figure S20. MS spectrum of dalpulapan C (3)
- Figure S21. ECD spectrum of dalpulapan B (2)
- Figure S22.  $^1\text{H}$  NMR spectrum of dalpulapan D (4)

Figure S23.  $^{13}\text{C}$  NMR spectrum of dalpulapan D (4)

Figure S24.  $^1\text{H}$ - $^1\text{H}$  COSY spectrum of dalpulapan D (4)

Figure S25. HMQC spectrum of dalpulapan D (4)

Figure S26. HMBC spectrum of dalpulapan D (4)

Figure S27. MS spectrum of dalpulapan D (4)

Figure S28. ECD spectrum of dalpulapan B (4)

Figure S29.  $^1\text{H}$  NMR spectrum of dalpulapan E (5)

Figure S30.  $^{13}\text{C}$  NMR spectrum of dalpulapan E (5)

Figure S31.  $^1\text{H}$ - $^1\text{H}$  COSY spectrum of dalpulapan E (5)

Figure S32. HMQC spectrum of dalpulapan E (5)

Figure S33. HMBC spectrum of dalpulapan E (5)

Figure S34. MS spectrum of dalpulapan E (5)

Figure S35. Experimental and calculated ECD spectrum of (2*S*,3*R*) dalpulapan E (5)

Figure S36. Calculated ECD spectrum of (2*R*,3*R* and 2*S*,3*S*) derivatives of 5

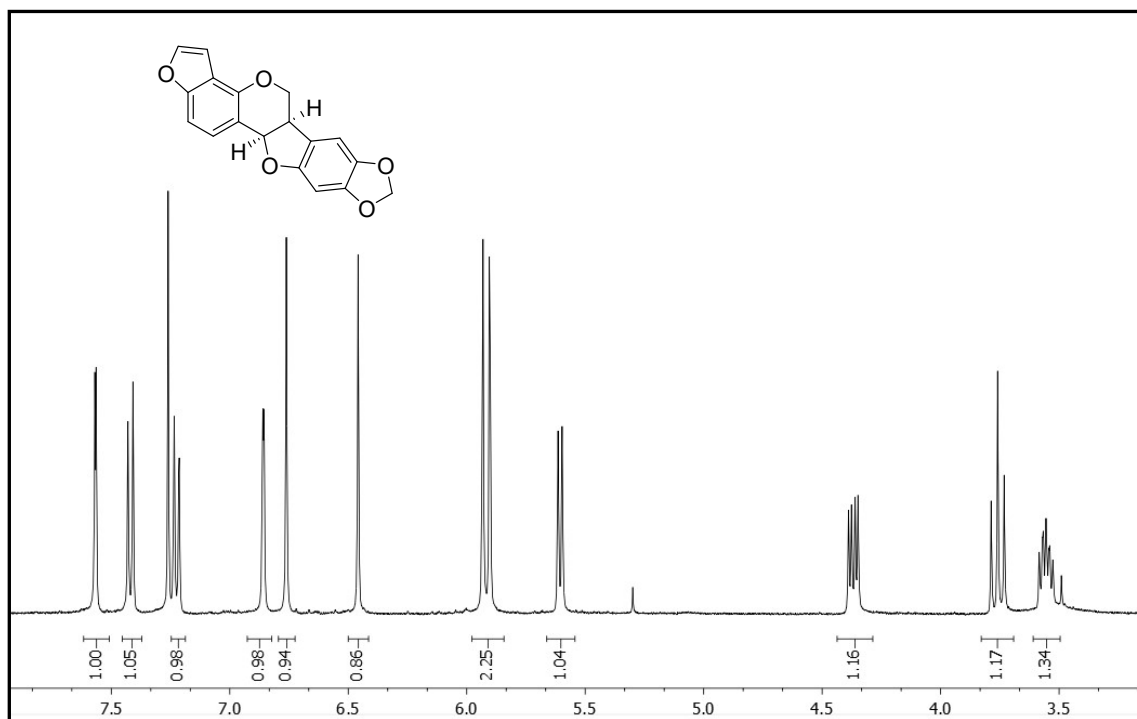Figure S1. <sup>1</sup>H NMR spectrum of dalpulan A (**1**)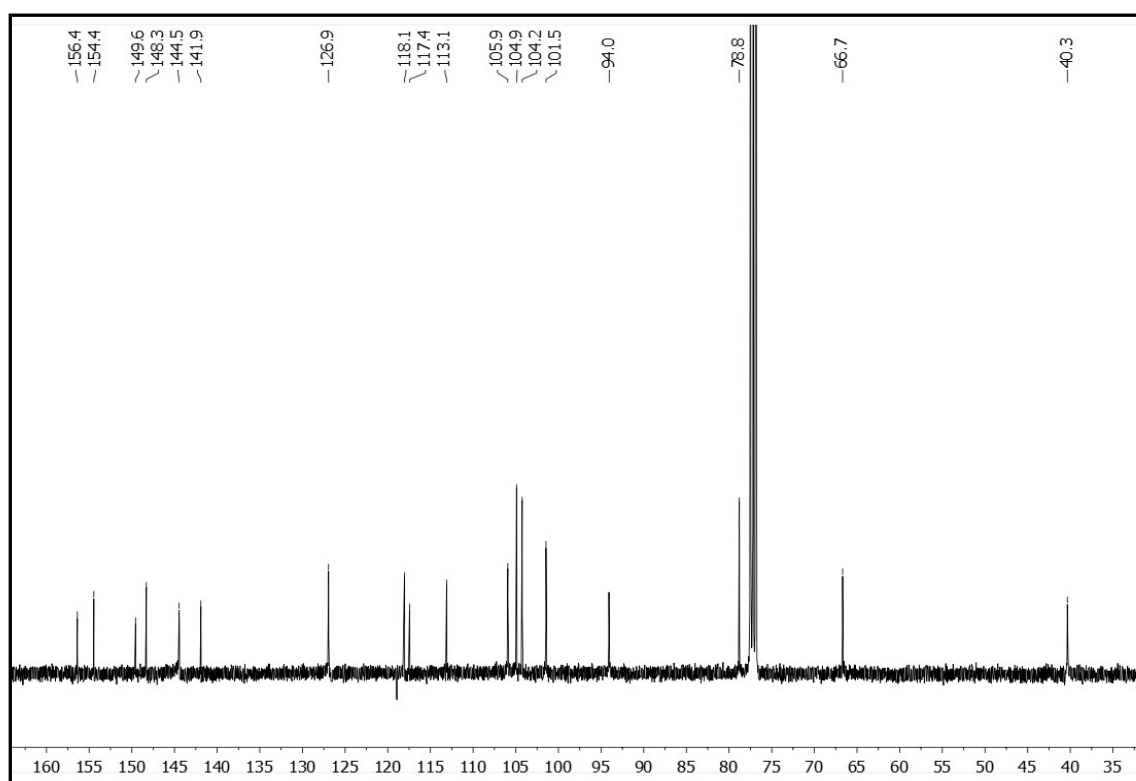Figure S2. <sup>13</sup>C NMR spectrum of dalpulan A (**1**)

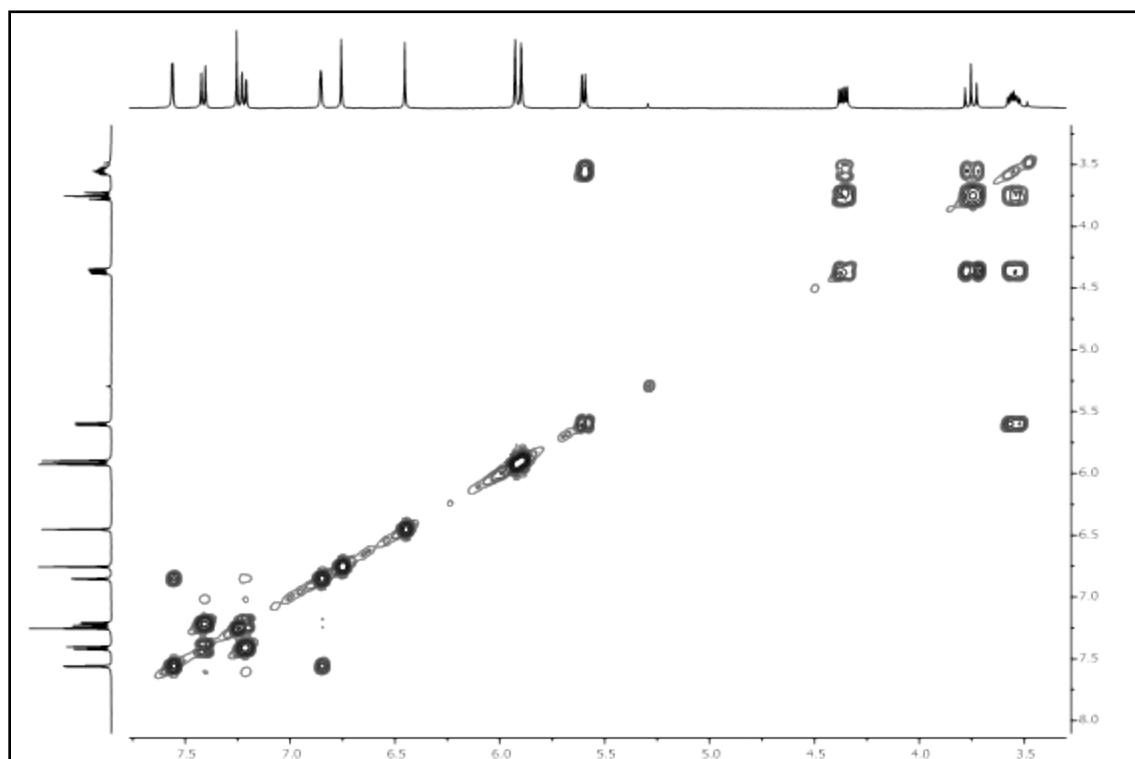

Figure S3.  $^1\text{H}$ - $^1\text{H}$  COSY spectrum of dalpulapan A (**1**)

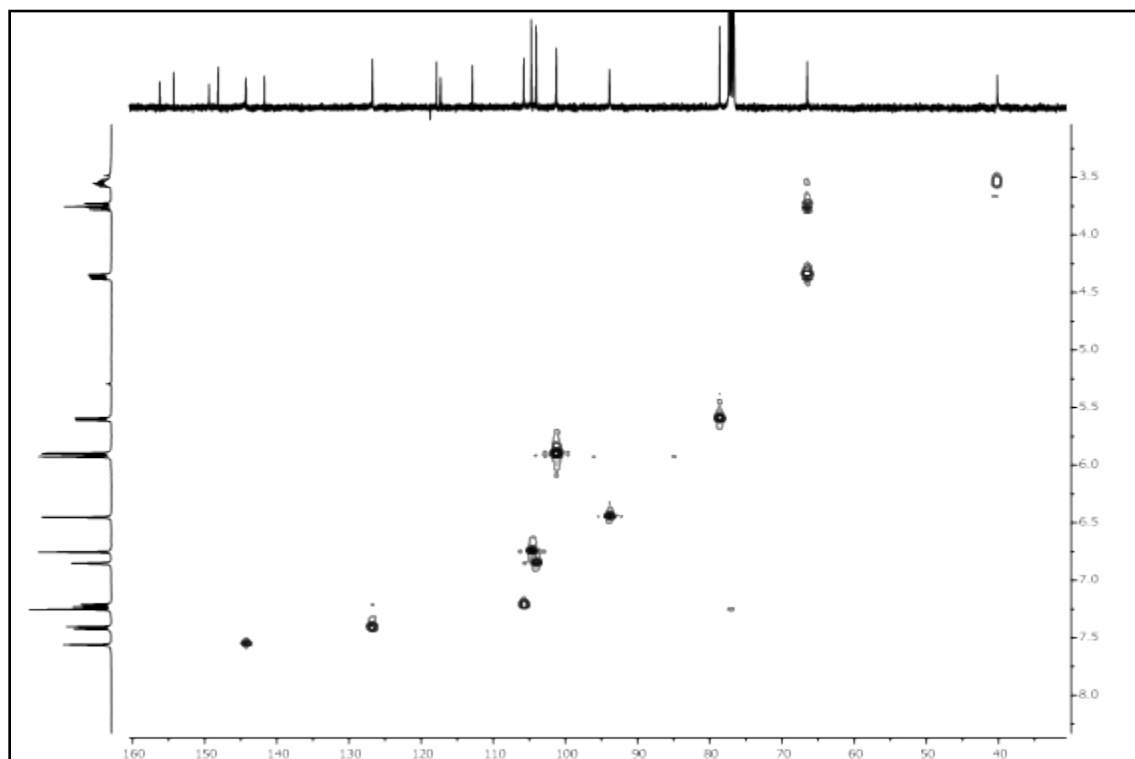

Figure S4. HMBC spectrum of dalpulapan A (**1**)

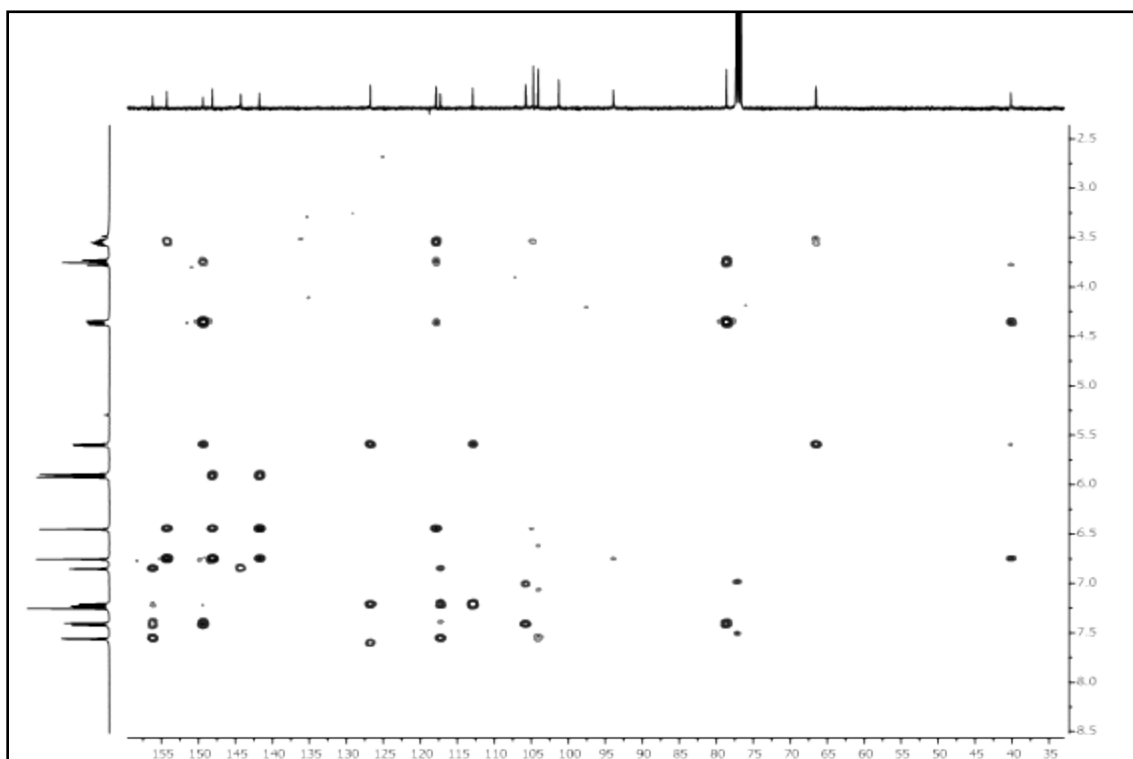

Figure S5. HMBC spectrum of dalpulapan A (**1**)

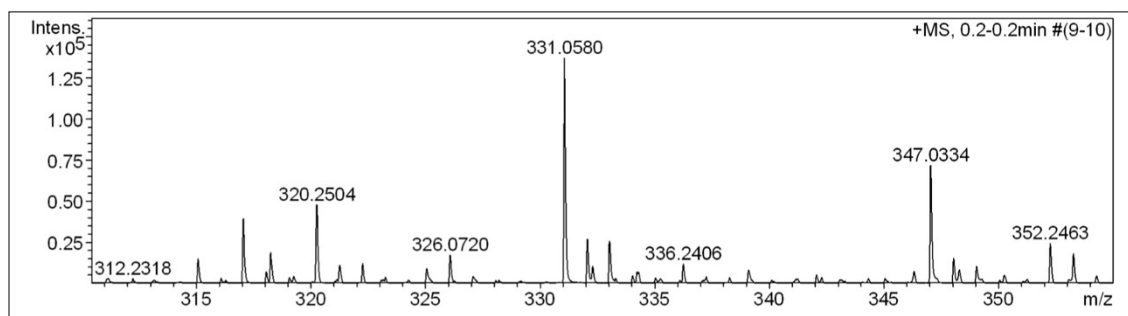

Figure S6. MS spectrum of dalpulapan A (**1**)

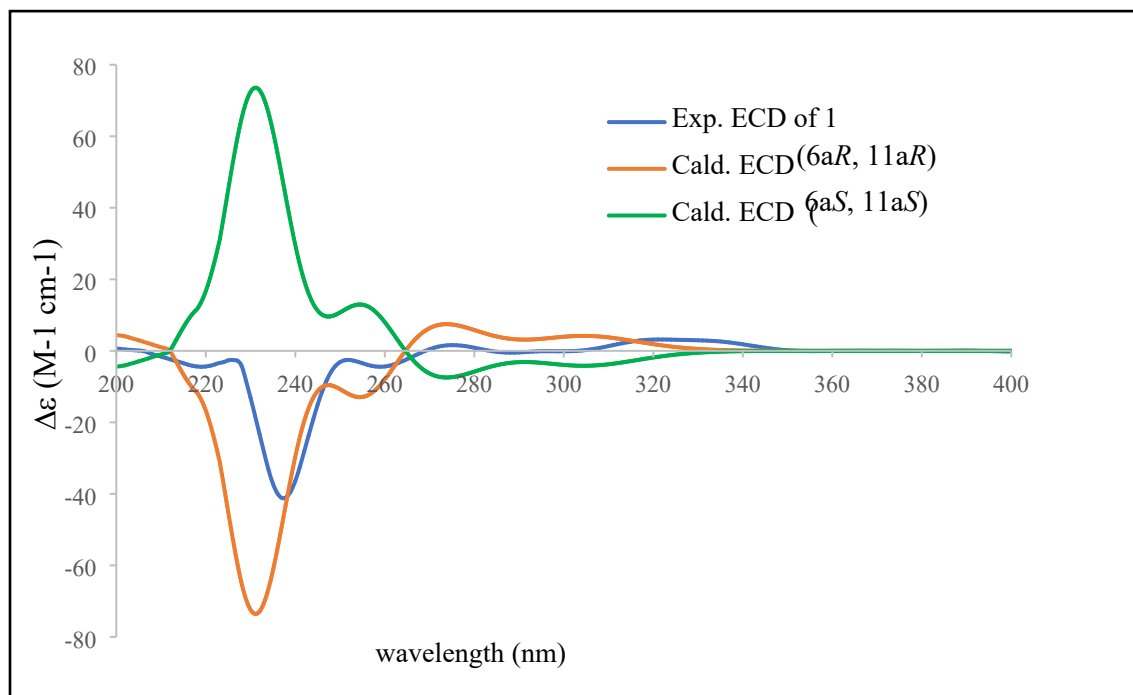Figure S7. ECD spectrum of dalpulapan A (**1**)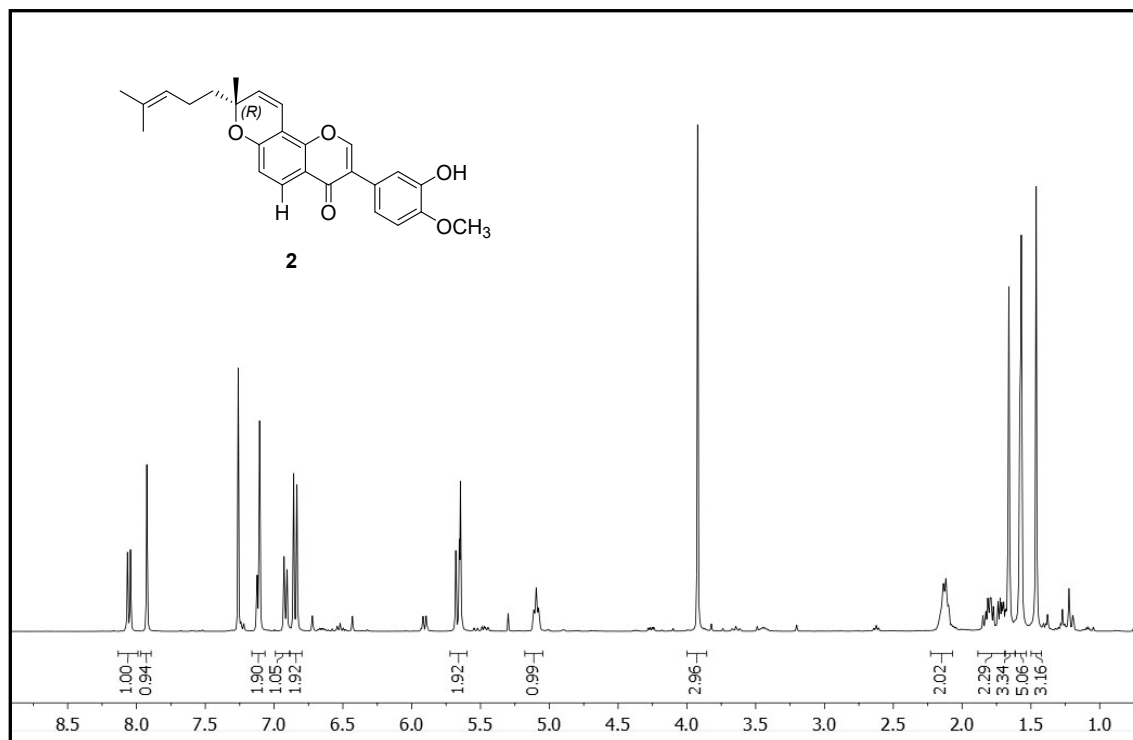Figure S8. <sup>1</sup>H NMR spectrum of dalpulapan B (**2**)

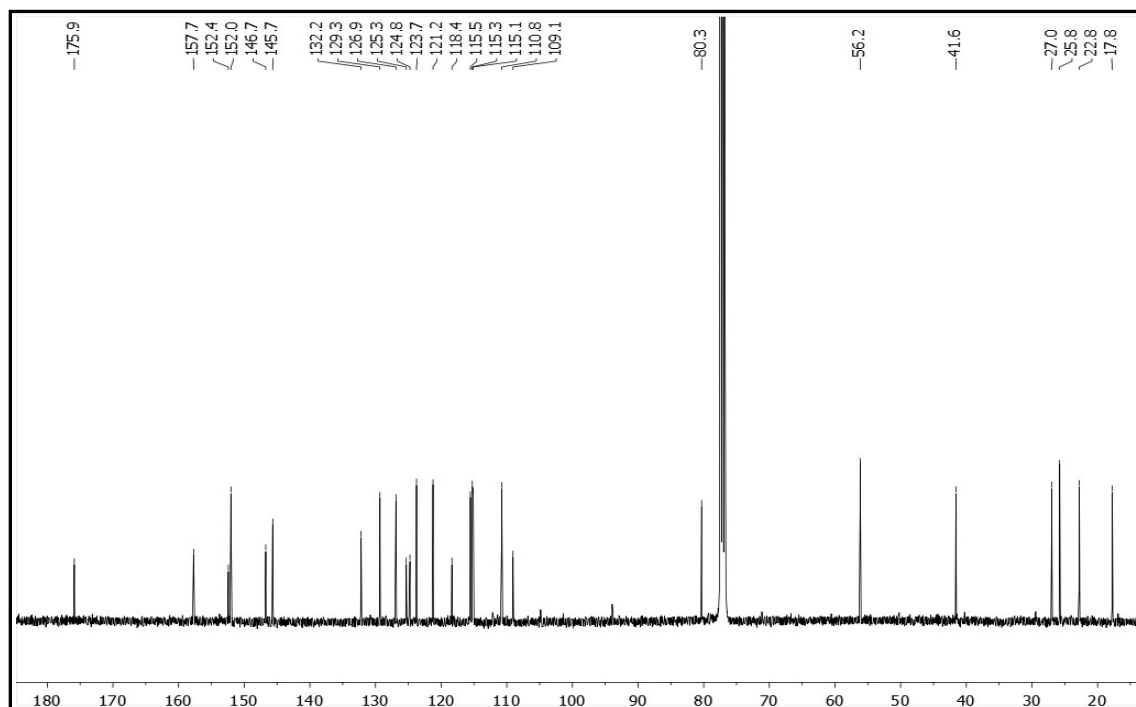

Figure S9.  $^{13}\text{C}$  NMR spectrum of dalpulan B (2)

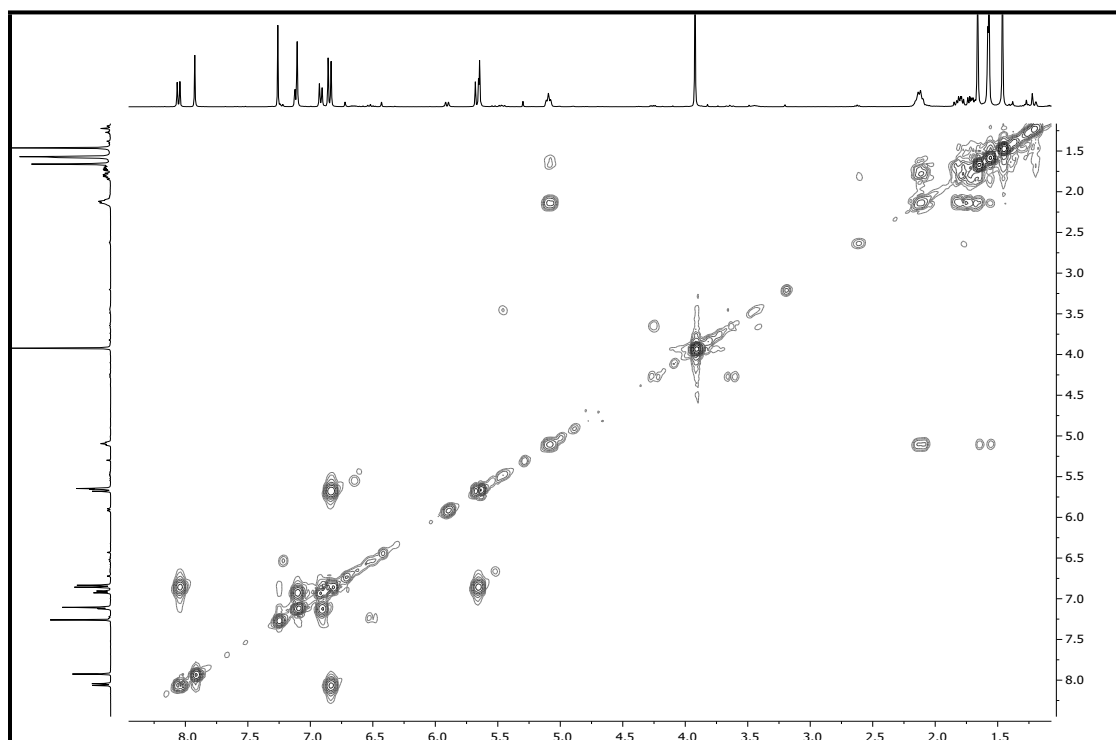

Figure S10.  $^1\text{H}$ - $^1\text{H}$  COSY spectrum of dalpulan B (2)



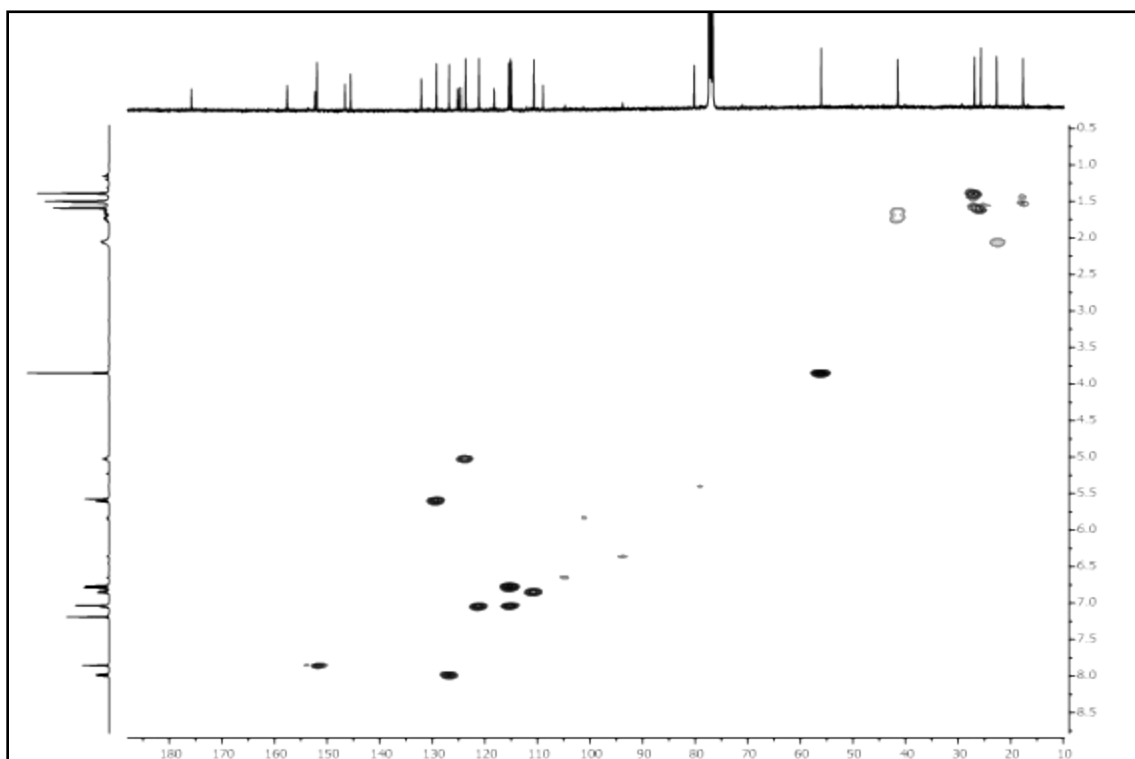

Figure S11. HMBC spectrum of dalpulapan B (2)

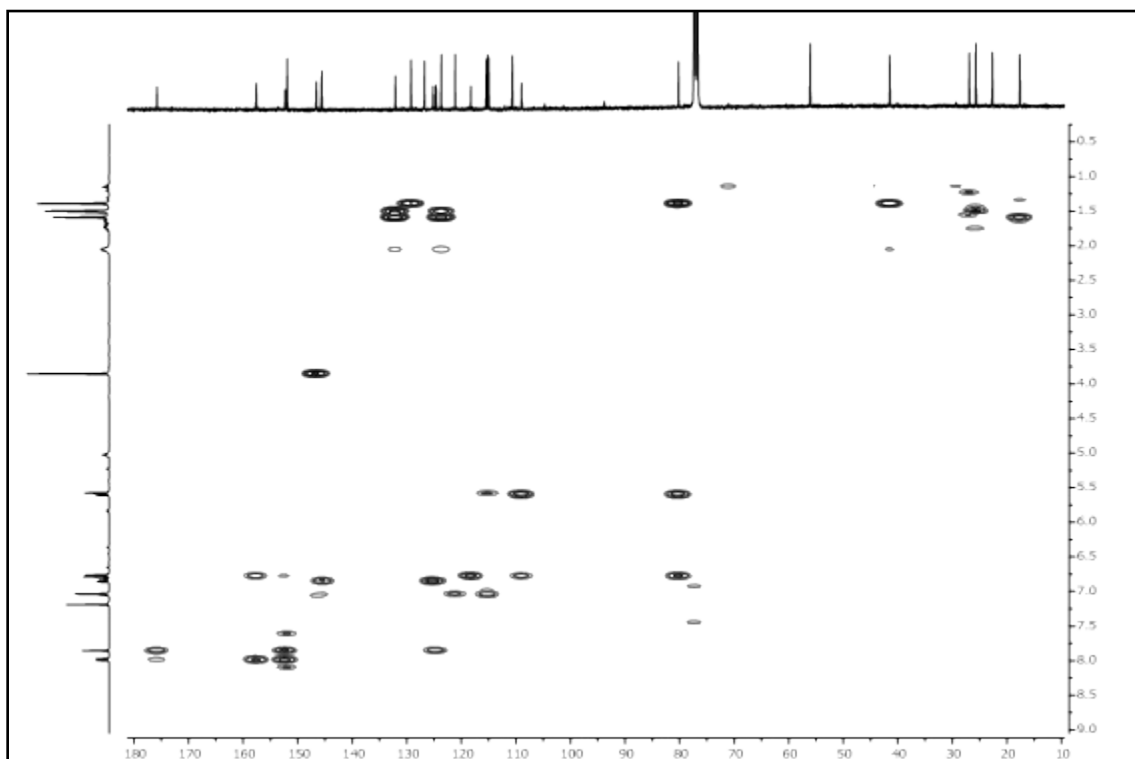

Figure S12. HMBC spectrum of dalpulapan B (2)

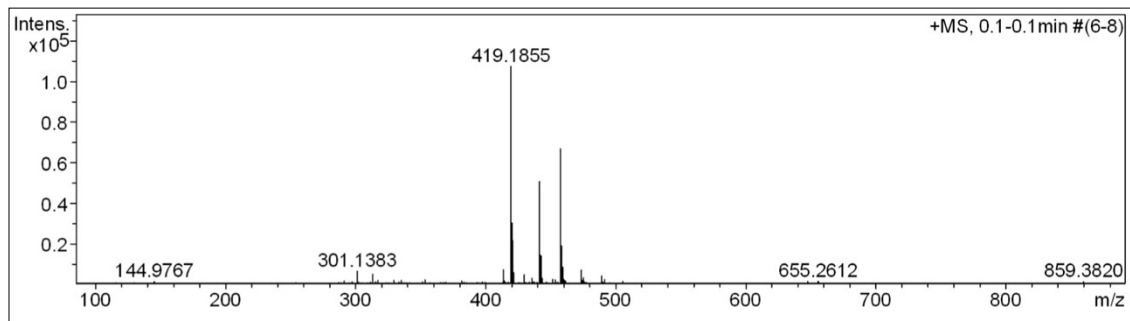

Figure S13. MS spectrum of dalpulapan B (2)

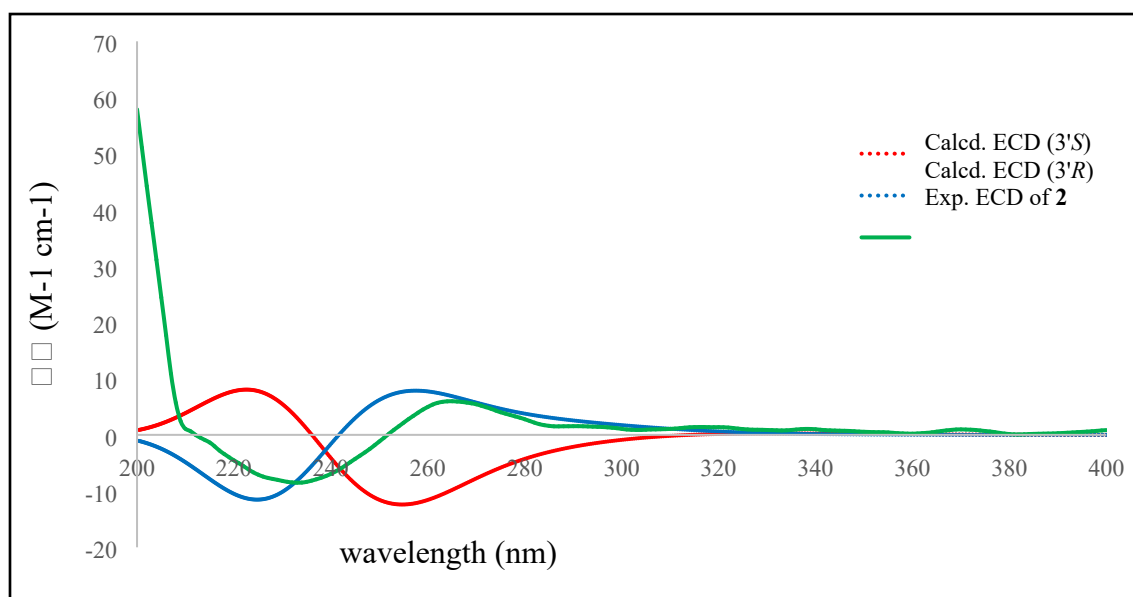

Figure S14. ECD spectrum of dalpulapan B (2)

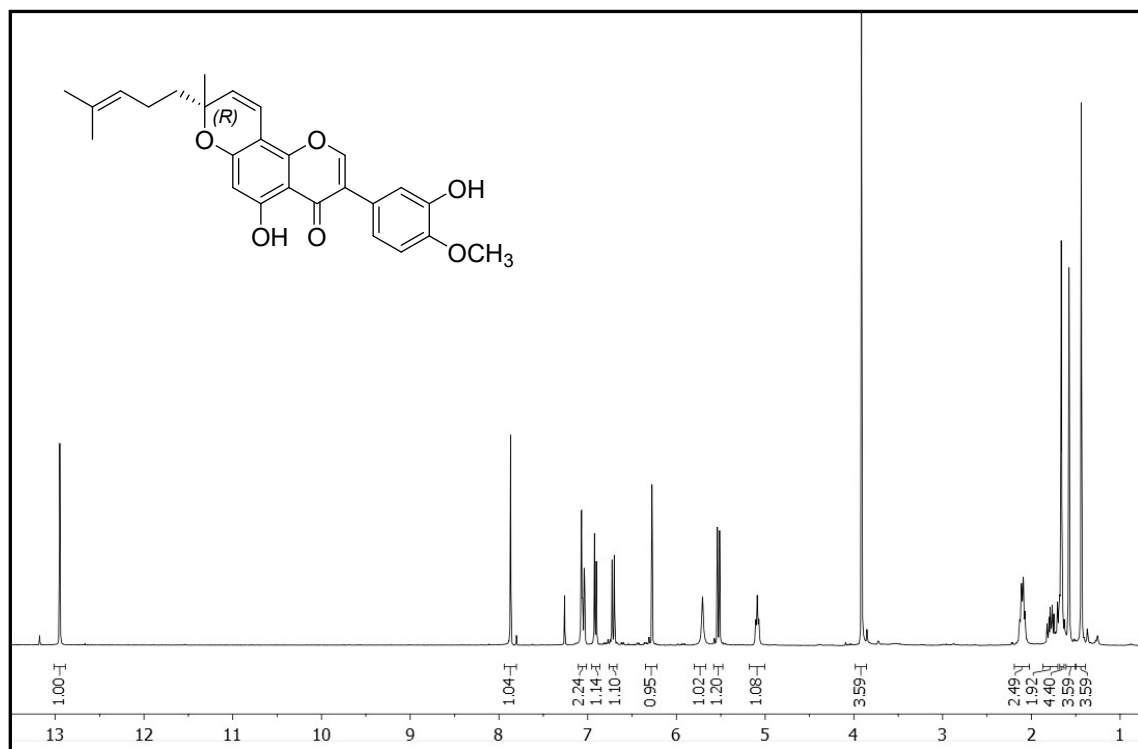Figure S15. <sup>1</sup>H NMR spectrum of dalpulapan C (3)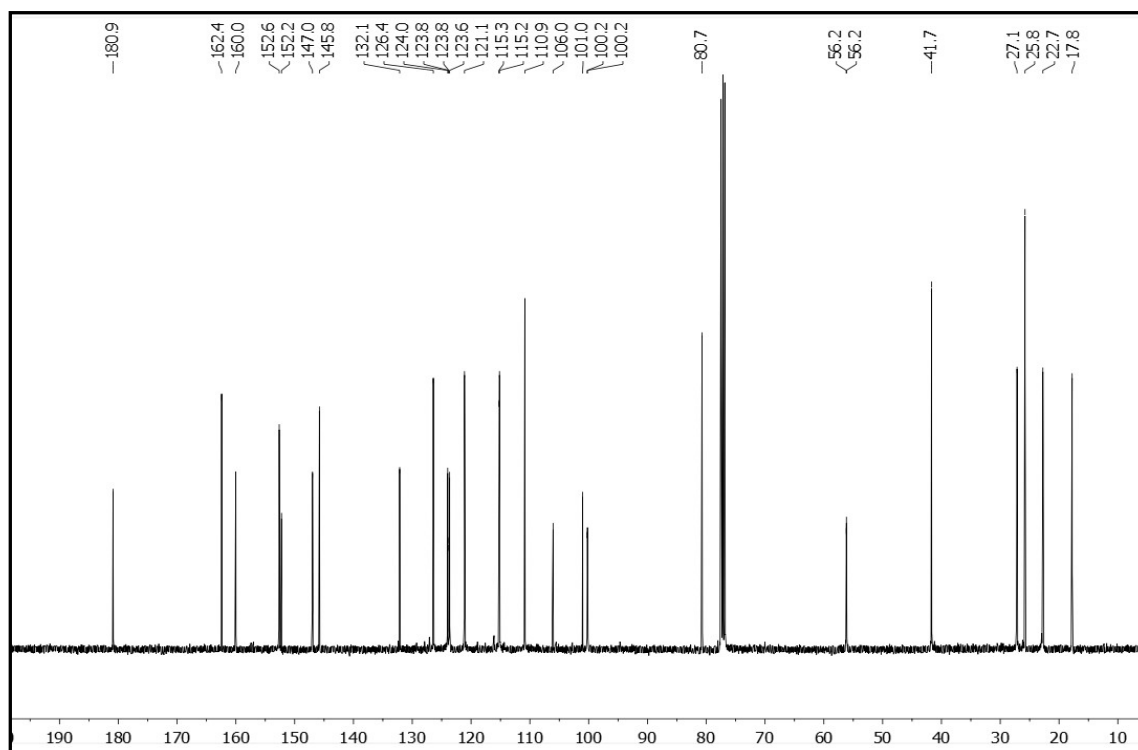Figure S16. <sup>13</sup>C NMR spectrum of dalpulapan C (3)

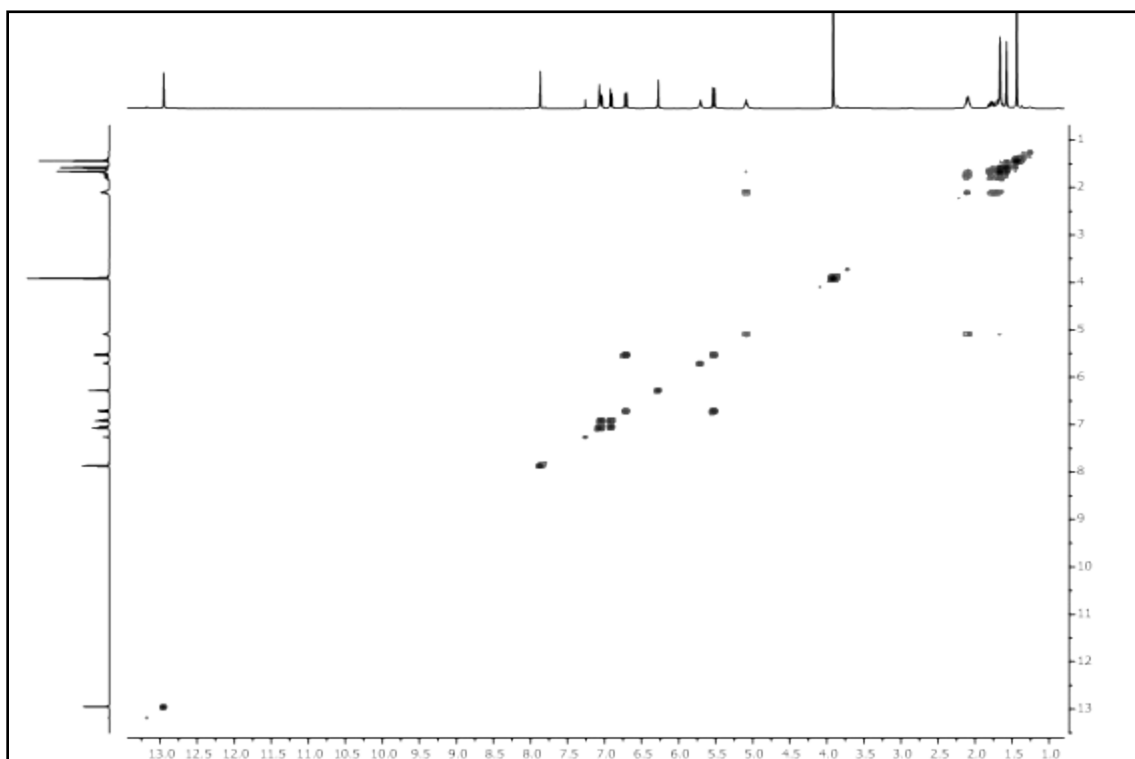

Figure S17.  $^1\text{H}$ - $^1\text{H}$  COSY spectrum of dalpulan C (**3**)

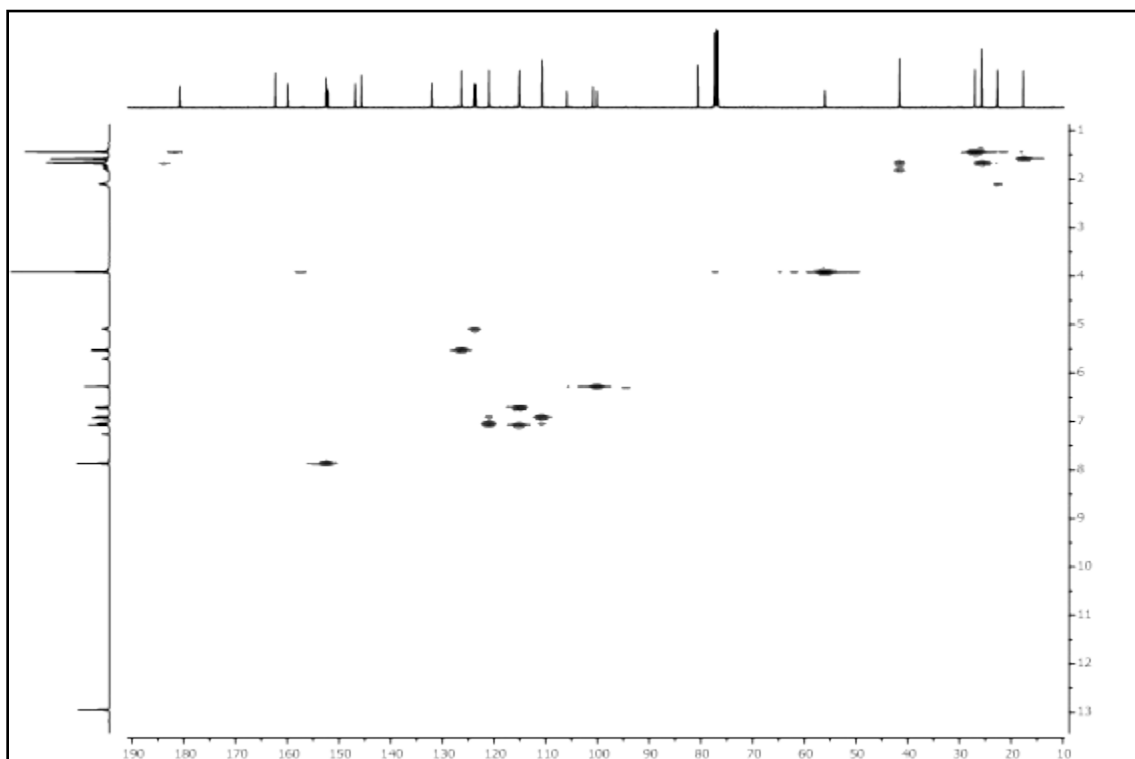

Figure S18. HMQC spectrum of dalpulan C (**3**)

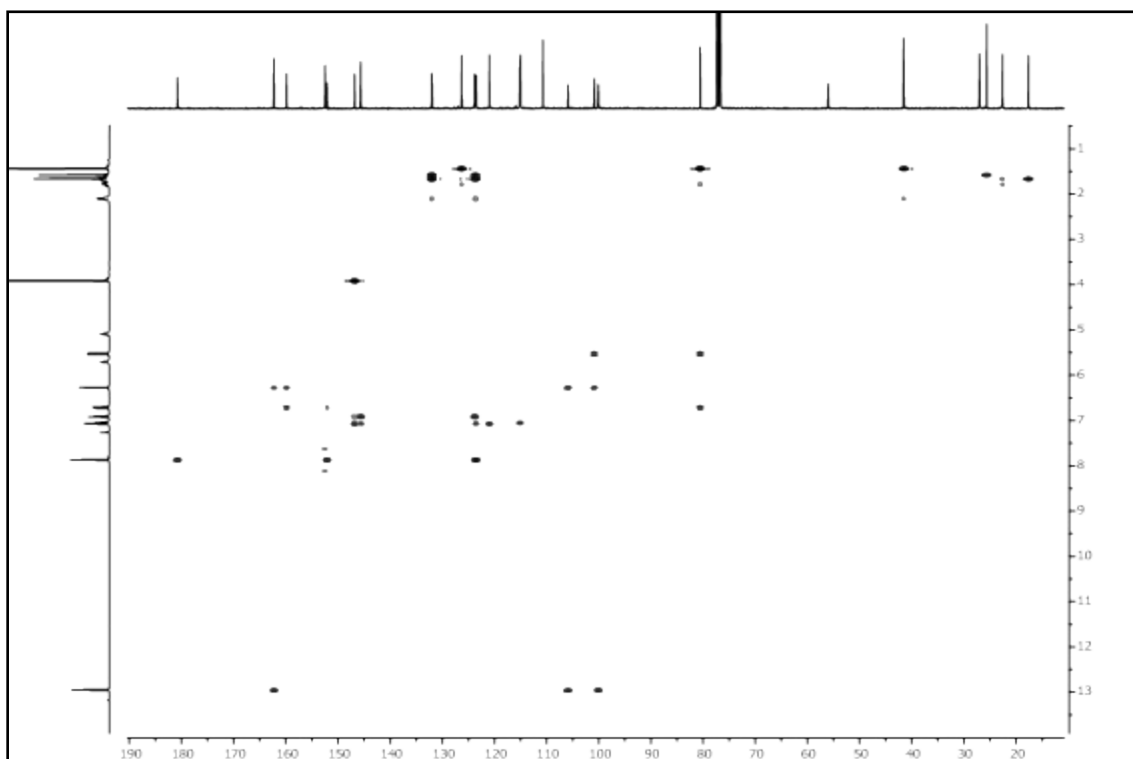

Figure S19. HMBC spectrum of dalpulapan C (**3**)

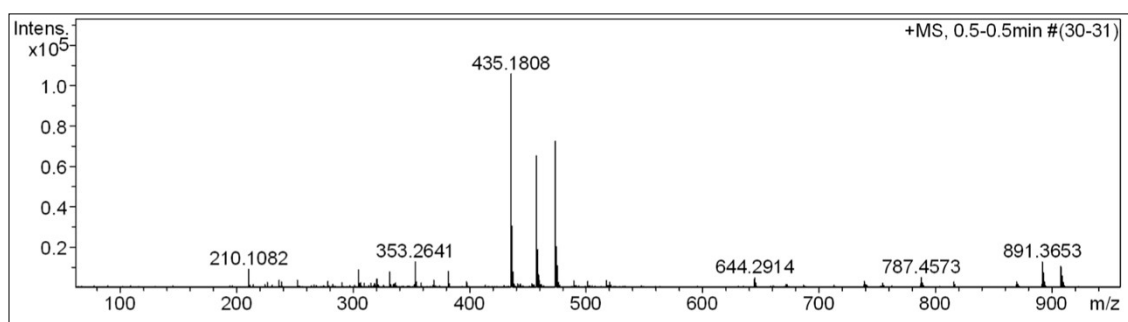

Figure S20. MS spectrum of dalpulapan C (**3**)

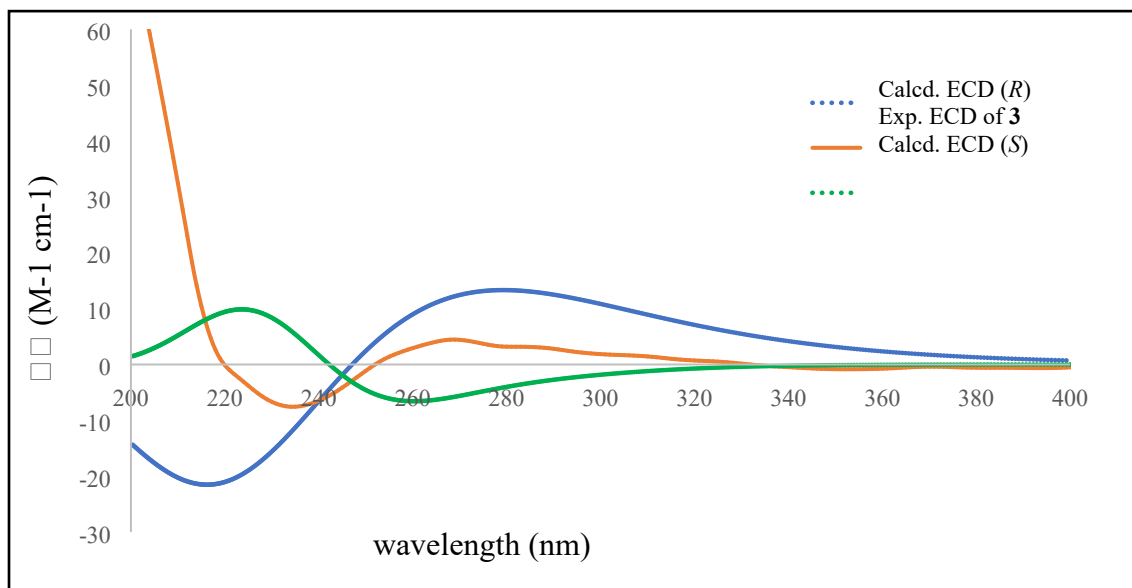

Figure S21. ECD spectrum of dalpulan C (3)

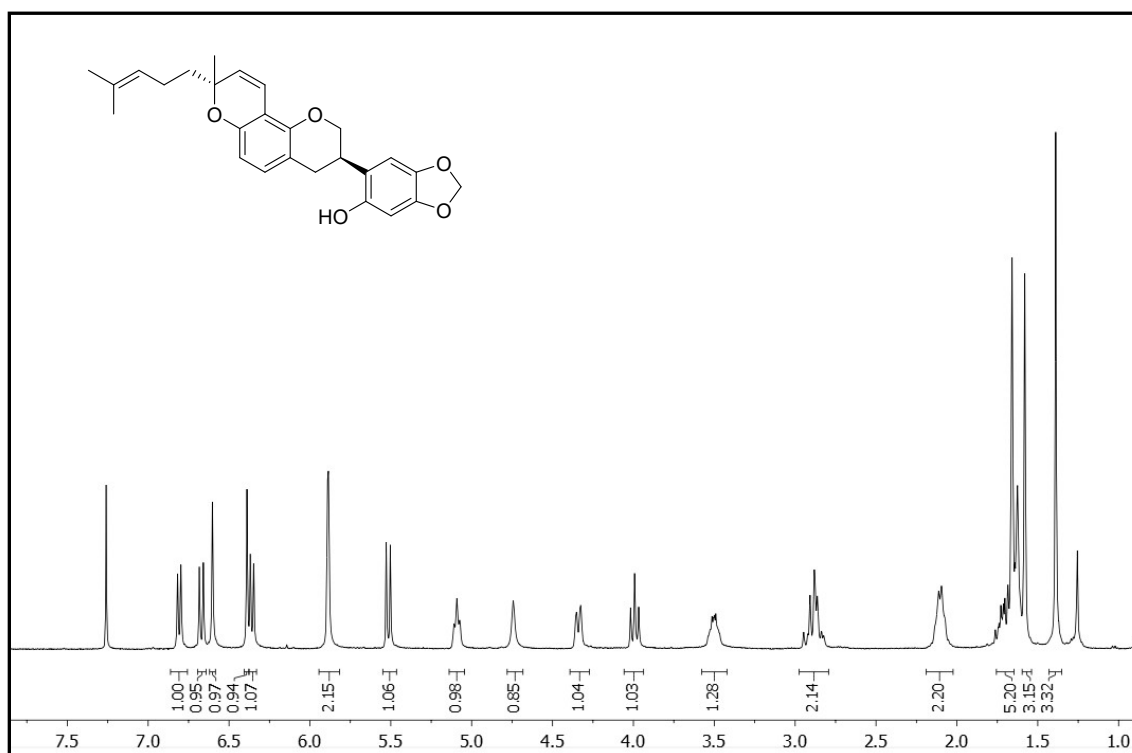Figure S22.  $^1\text{H NMR}$  spectrum of dalpulan D (4)

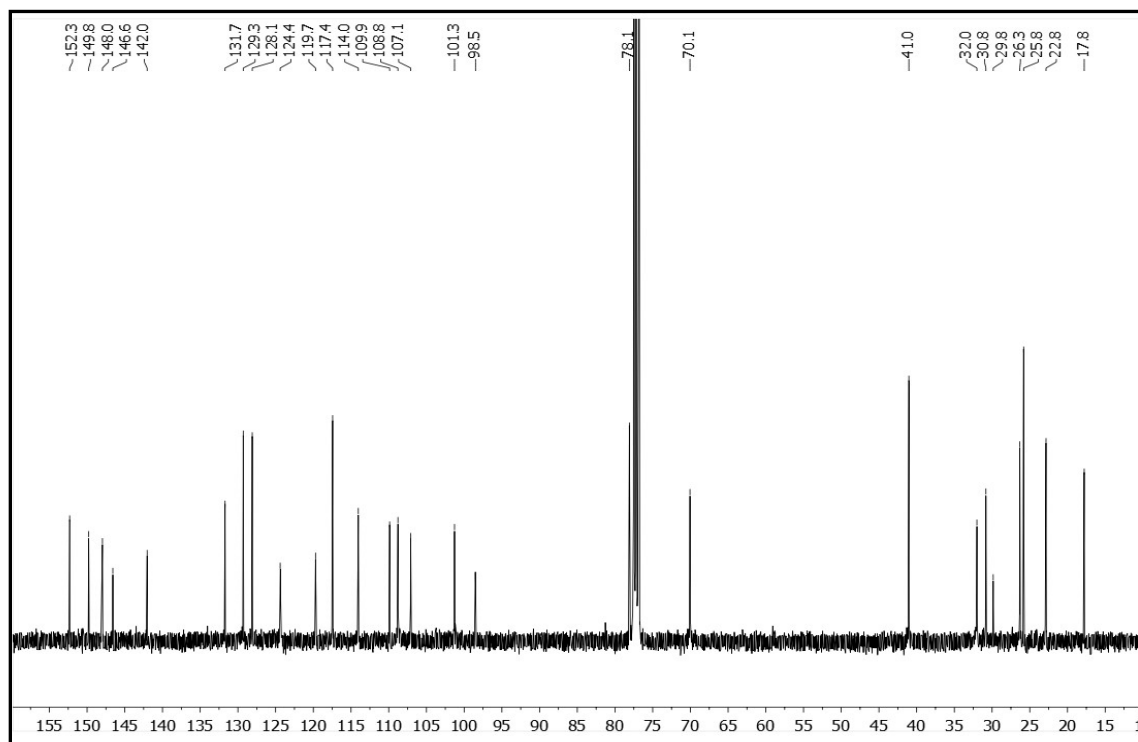Figure S23.  $^{13}\text{C}$  NMR spectrum of dalpulan D (4)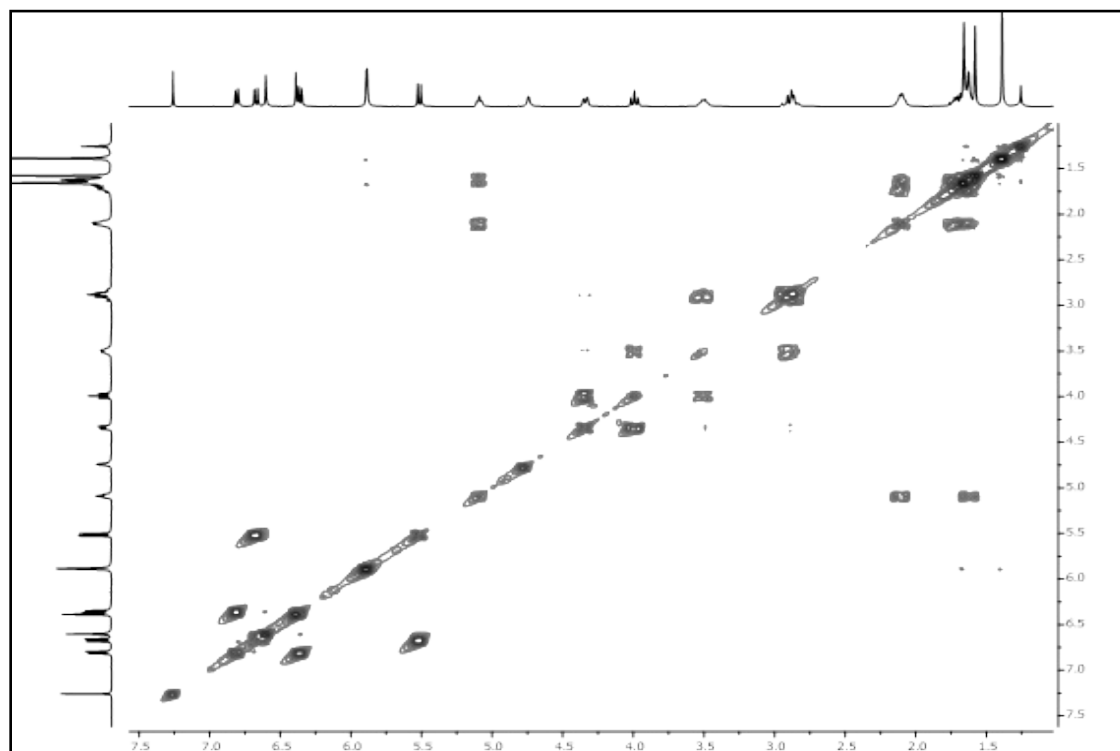Figure S24.  $^1\text{H}$ - $^1\text{H}$  COSY spectrum of dalpulan D (4)

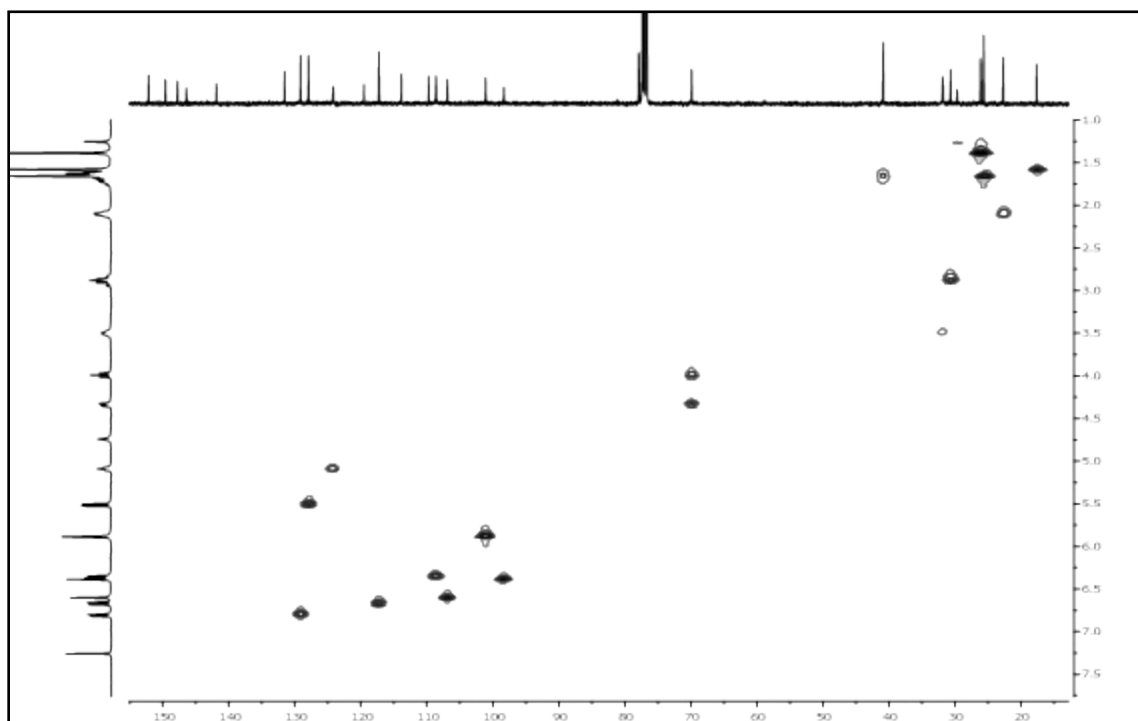

Figure S25. HMQC spectrum of dalpulapan D (4)

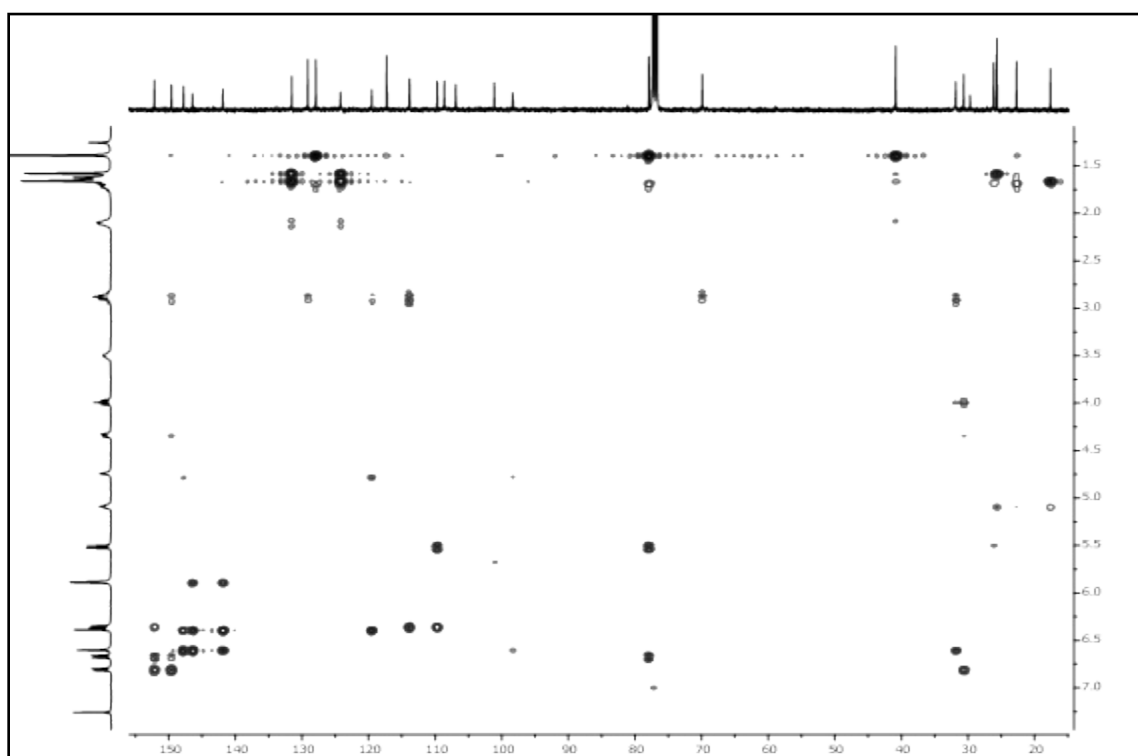

Figure S26. HMBC spectrum of dalpulapan D(4)



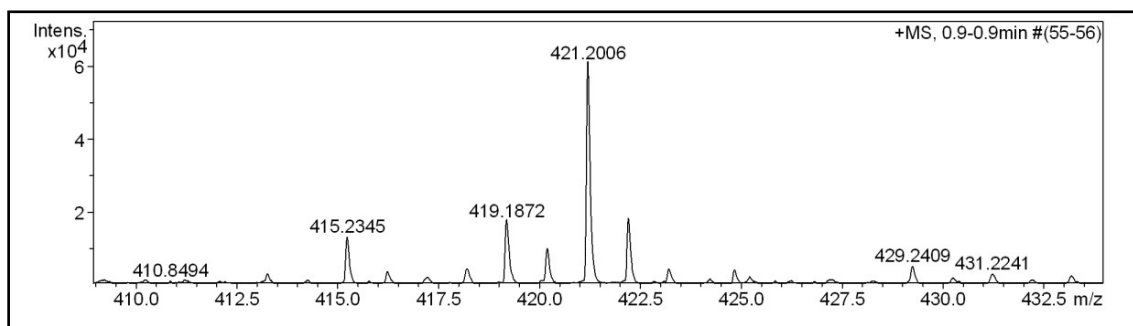

Figure S27. MS spectrum of dalpulapan D (4)

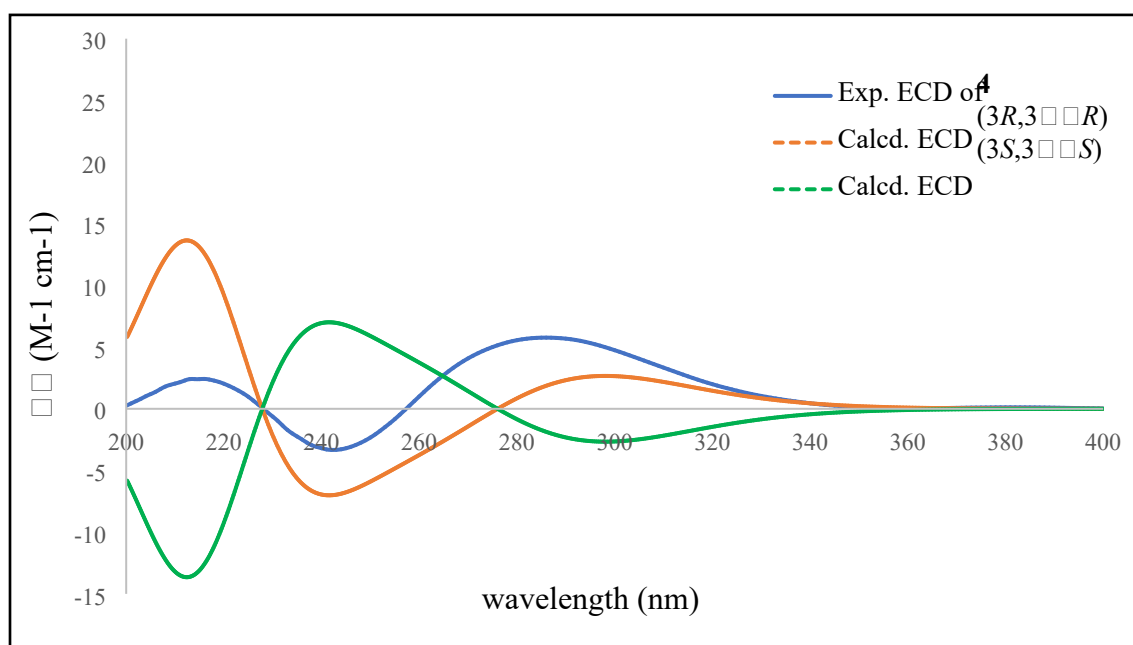

Figure S28. ECD spectrum of dalpulapan D (4)

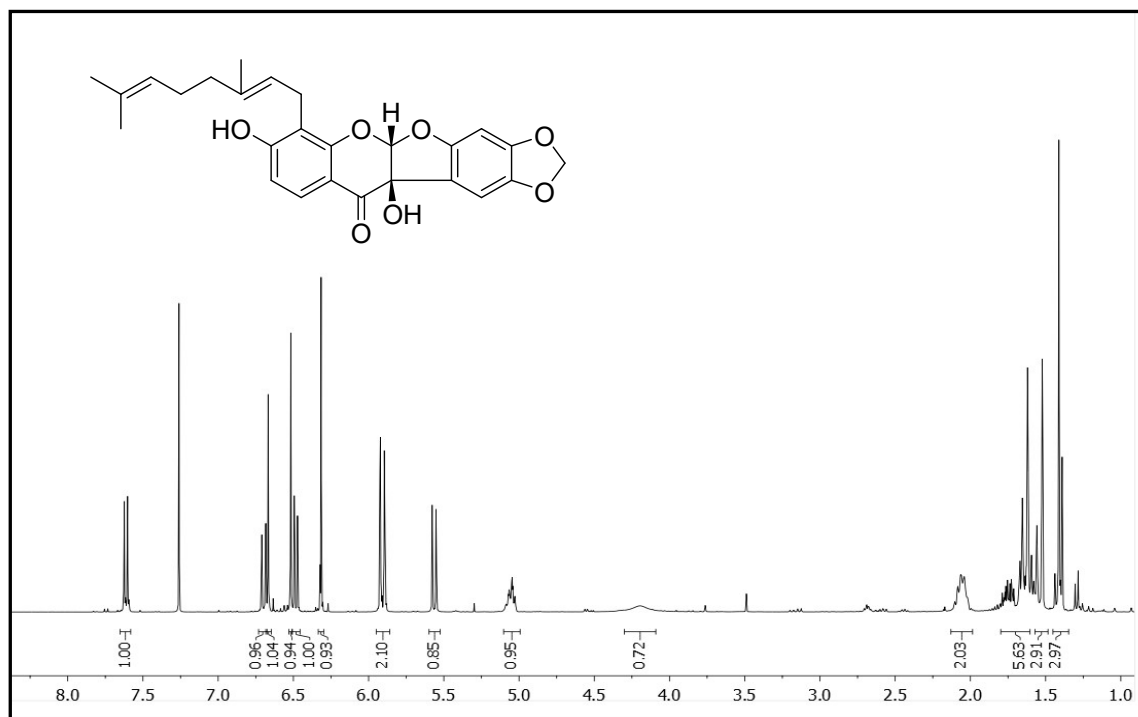Figure S29. <sup>1</sup>H NMR spectrum of dalpulapan E (5)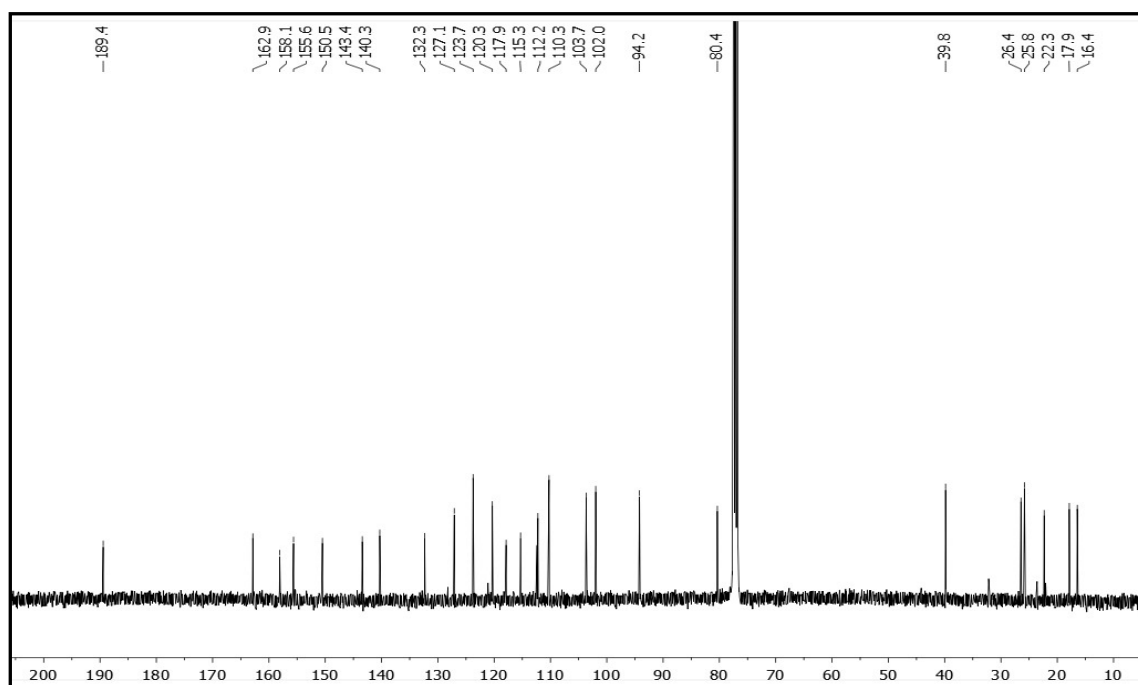Figure S30. <sup>13</sup>C NMR spectrum of dalpulapan E (5)

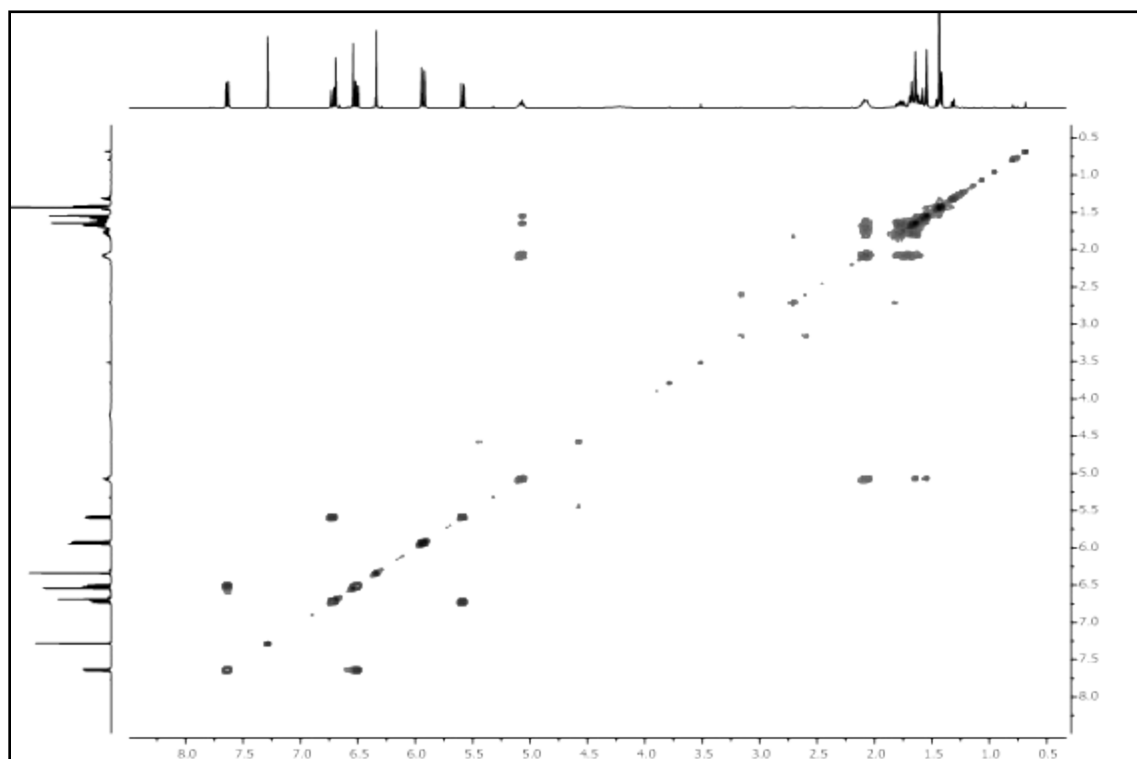

Figure S31.  $^1\text{H}$ - $^1\text{H}$  COSY spectrum of dalpulapan E (5)

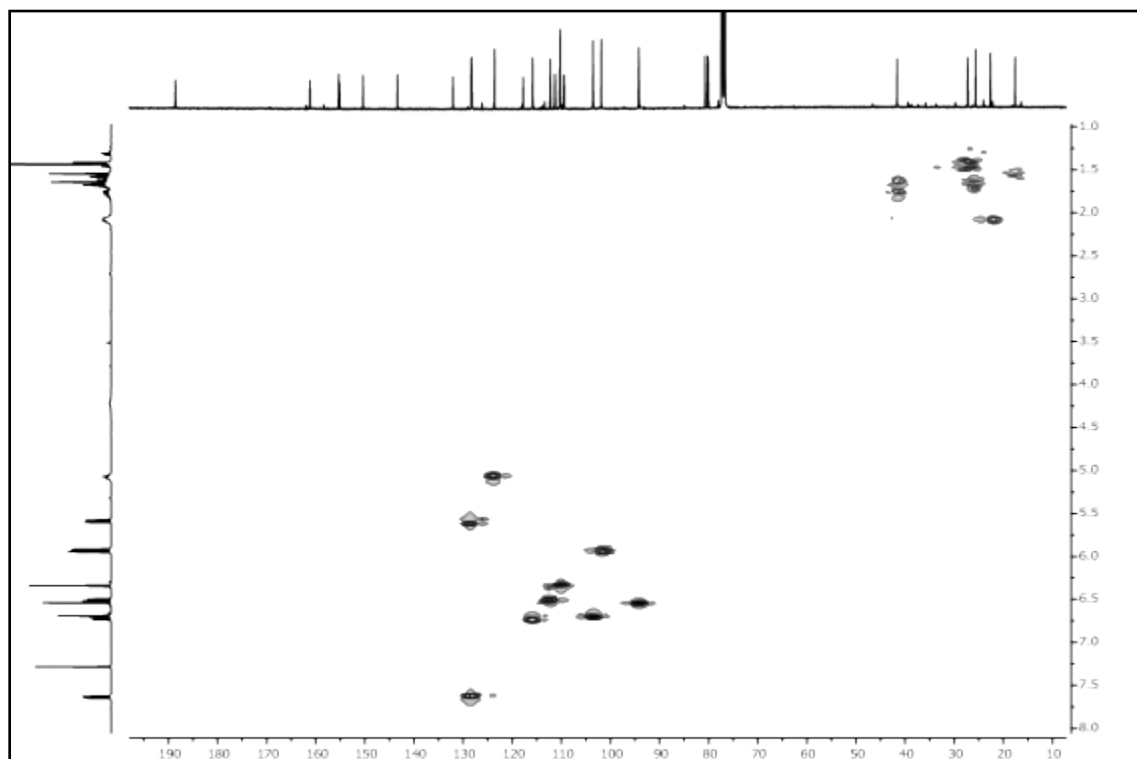

Figure S32. HMQC spectrum of dalpulapan E (5)

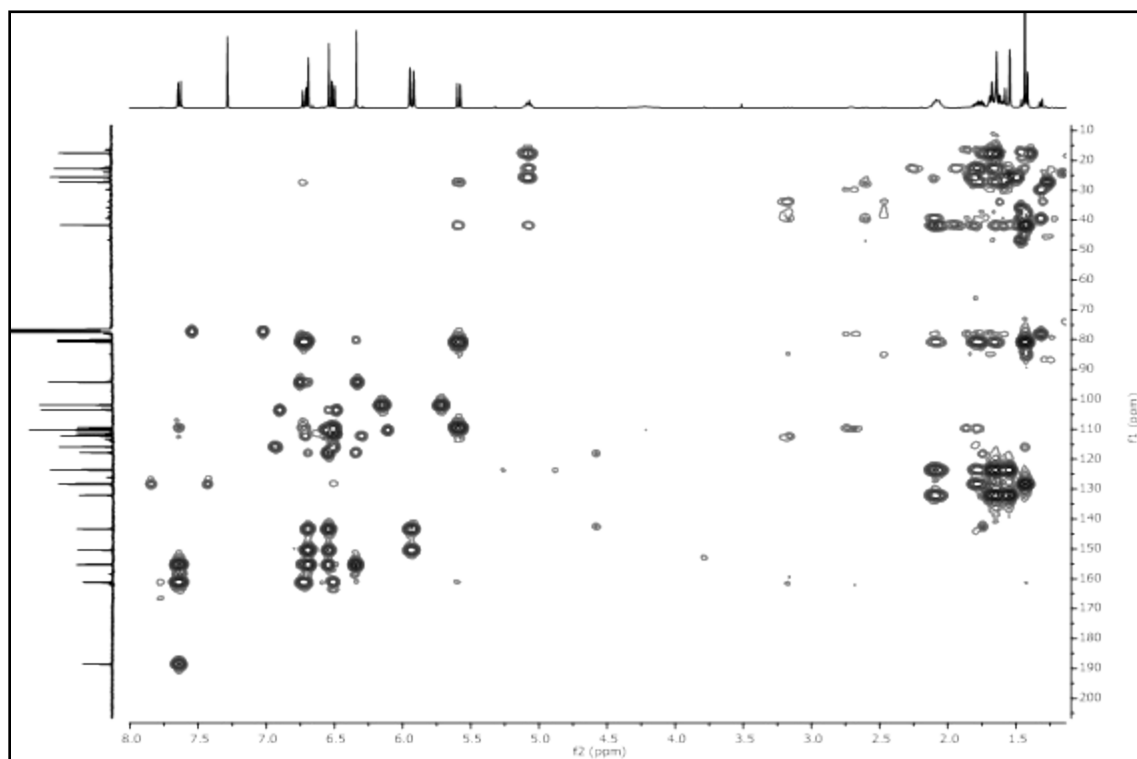

Figure S33. HMBC spectrum of dalpulapan E (5)

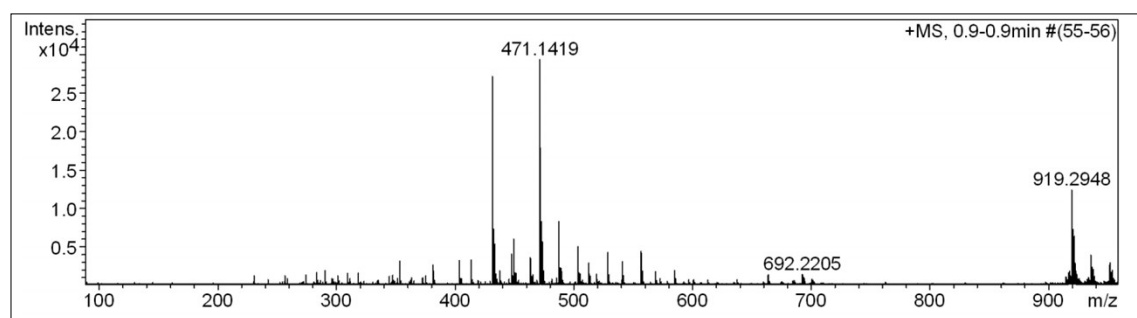

Figure S34. MS spectrum of dalpulapan E (5)

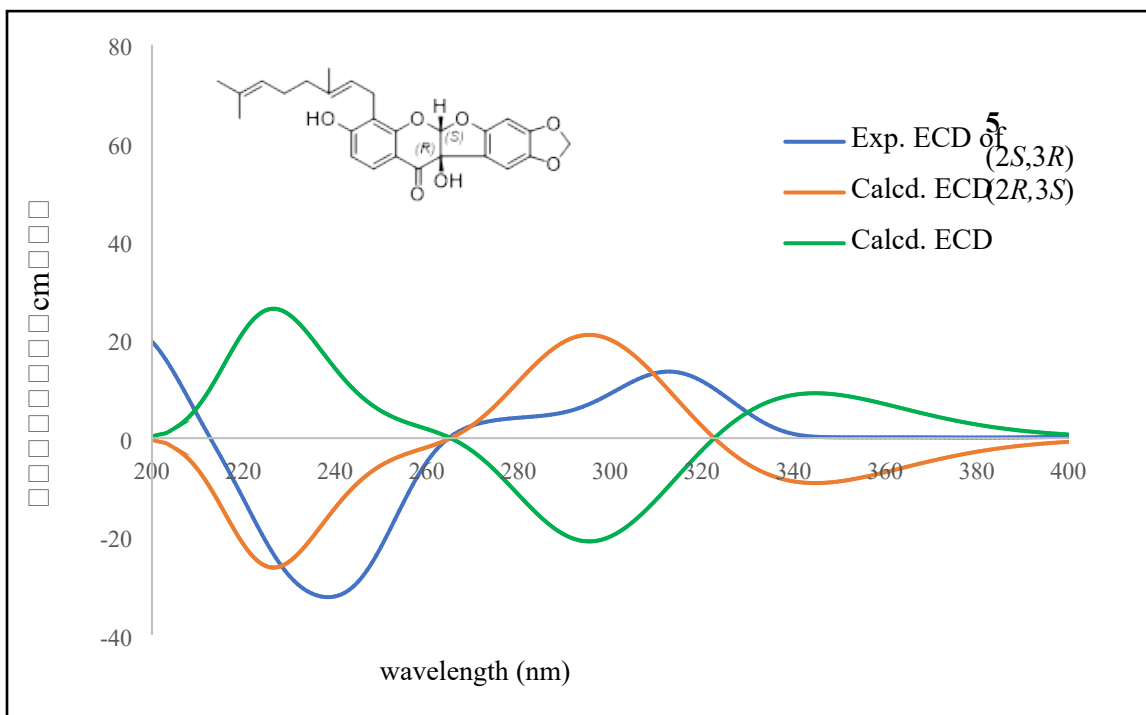

Figure S35. Experimental and calculated ECD spectrum of (2*S*,3*R*) dalpulan E (**5**)

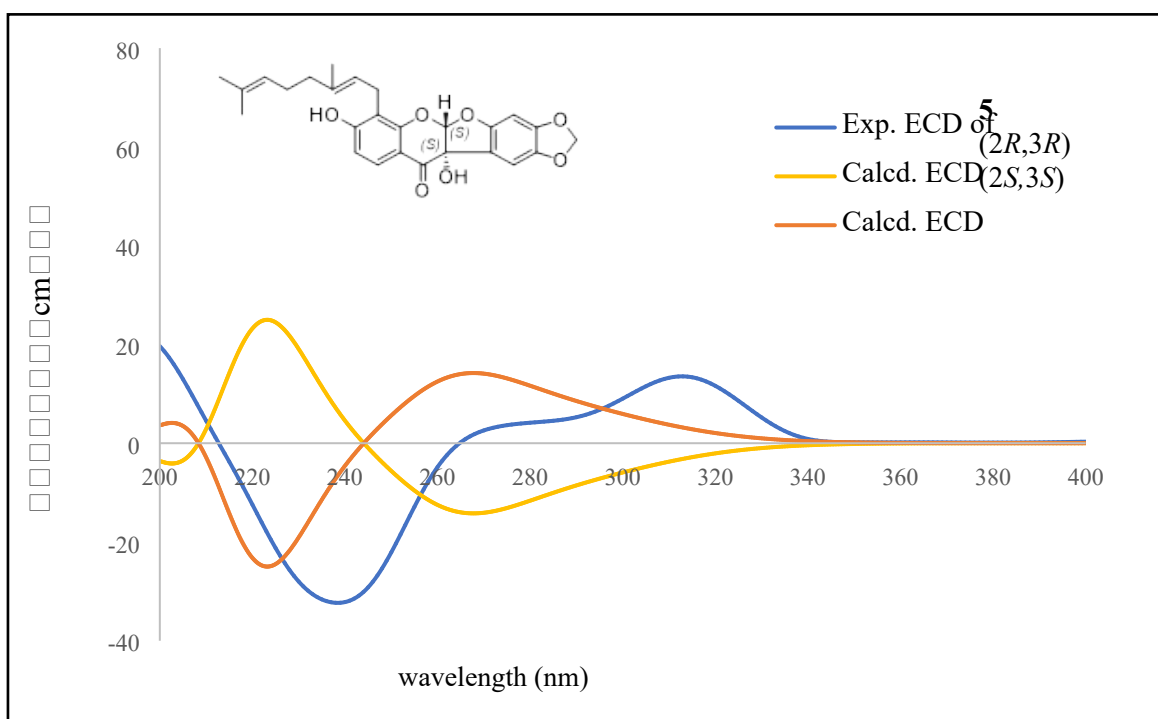

Figure S36. Calculated ECD spectrum of (2*R*,3*R* and 2*S*,3*S*) derivatives of **5**
